# Supplementary material
Source: publisher figshare collection journal article supplement (https://acs.figshare.com/ndownloader/files/26115028)
Supplement: Supplementary file 1 [file 26115028]

## Supporting Information

### Development of Reaction-based AIE Handy Pen for Visual Detection of Toxic Vapors

Xuelin Huang,<sup>†a</sup> Zhe Jiao,<sup>†\*b,c</sup> Zongning Guo,<sup>a</sup> Jialing Yang,<sup>b</sup> Parvej Alam,<sup>c</sup> Yong Liu,<sup>d</sup> Yongfan Men,<sup>e</sup> Pengfei Zhang,<sup>\*c,e,f</sup> Haitao Feng,<sup>\*c,g</sup> Shuhuai Yao,<sup>c</sup> Ben Zhong Tang<sup>\*c,f</sup>

a. Huangpu Customs District Technology Center, Dongguan 523000, China

b. School of Environment and Civil Engineering, Dongguan University of Technology, Dongguan 523808, China

c. Department of Chemistry, Hong Kong Branch of Chinese National Engineering Research Centre for Tissue Restoration and Reconstruction, Department of Chemical and Biological Engineering, the Hong Kong University of Science and Technology, Clear Water Bay, Kowloon, Hong Kong

d. AIE Institute, Guangzhou Development District, Huangpu, Guangzhou, 510530, China

e. Guangdong Key Laboratory of Nanomedicine, Shenzhen Engineering Laboratory of Nanomedicine and Nanoformulations, CAS Key Laboratory of Health Informatics, Institute of Biomedicine and Biotechnology, Shenzhen Institute of Advanced Technology, Chinese Academy of Sciences, Shenzhen 518055, China

f. HKUST-Shenzhen Research Institute, No. 9 Yuexing First Road, Nanshan, Shenzhen 518057, China

g. Baoji AIE Research Center, Shaanxi Key Laboratory of Phytochemistry, College of Chemistry and Chemical Engineering, Baoji University of Arts and Sciences, Baoji 721013, China

**Supplementary Figures:**

**Figure**

**S1.....3**

**Figure**

**S2.....4**

**Figure**

**S3.....5**

**Figure S4.....**

**5**

**Figure S5.....**

**6**

**Figure S6.....**

6

Figure

S7.....7

Figure

S8.....8

Figure S9.....

8

Figure

S10.....9

Figure

S11.....9

Figure

S12.....9

Figure

S13.....10

Figure S14.....

10

Figure S15.....

12

Figure

S16.....12

Figure

|           |    |
|-----------|----|
| S17 ..... | 13 |
|-----------|----|

Table

|          |    |
|----------|----|
| S1 ..... | 13 |
|----------|----|

Table

|          |    |
|----------|----|
| S2 ..... | 14 |
|----------|----|

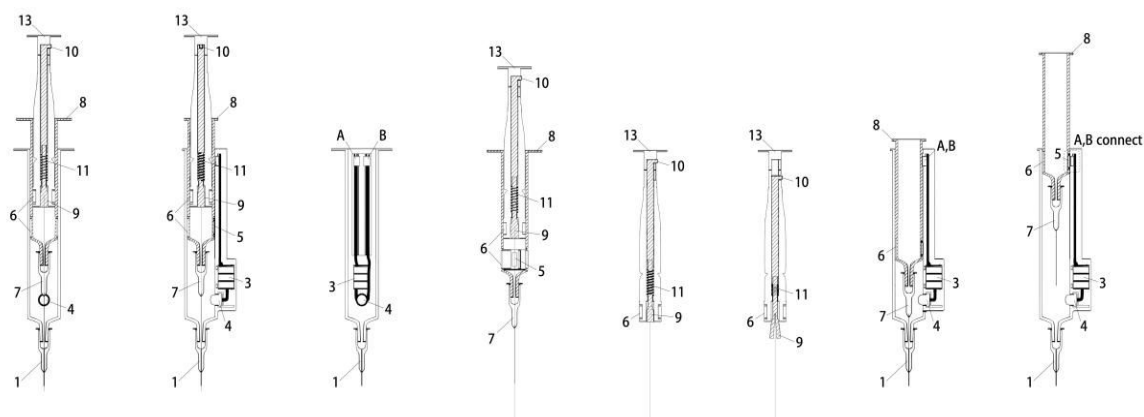

**Figure S1.** The structure of AIE handy pen

1. Outer needle; 2. Observation window; 3. power; 4. UV light; 5. Metal sheets; 6. Buffer zone; 7. Inner needle; 8. Lug; 9. Chuck; 10. Slider; 11. Spring; 12. Cover; 13. Piston; A、B-Metal contact; C、D-Sliding slot

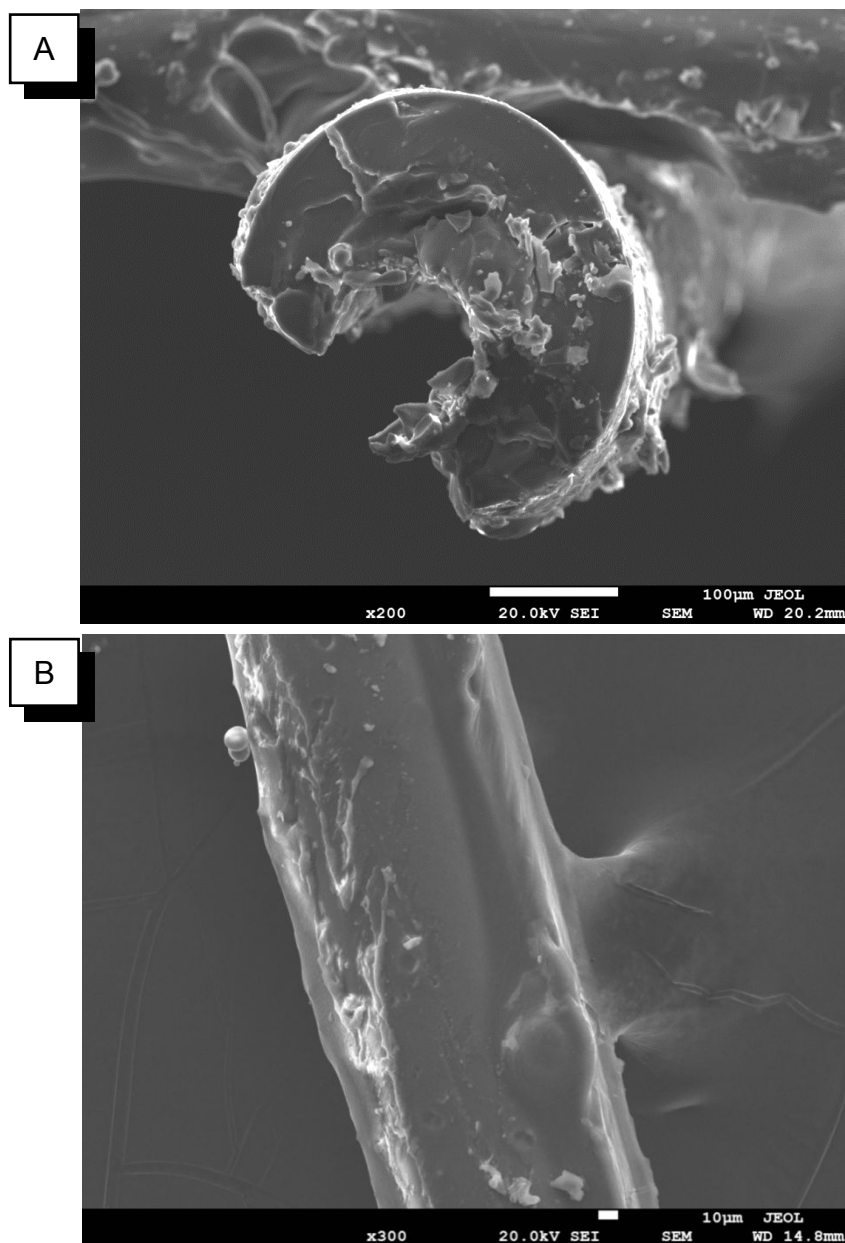

**Figure S2.** The SEM graphs of coated film (A) intersecting surface (B) the overall surface of fiber

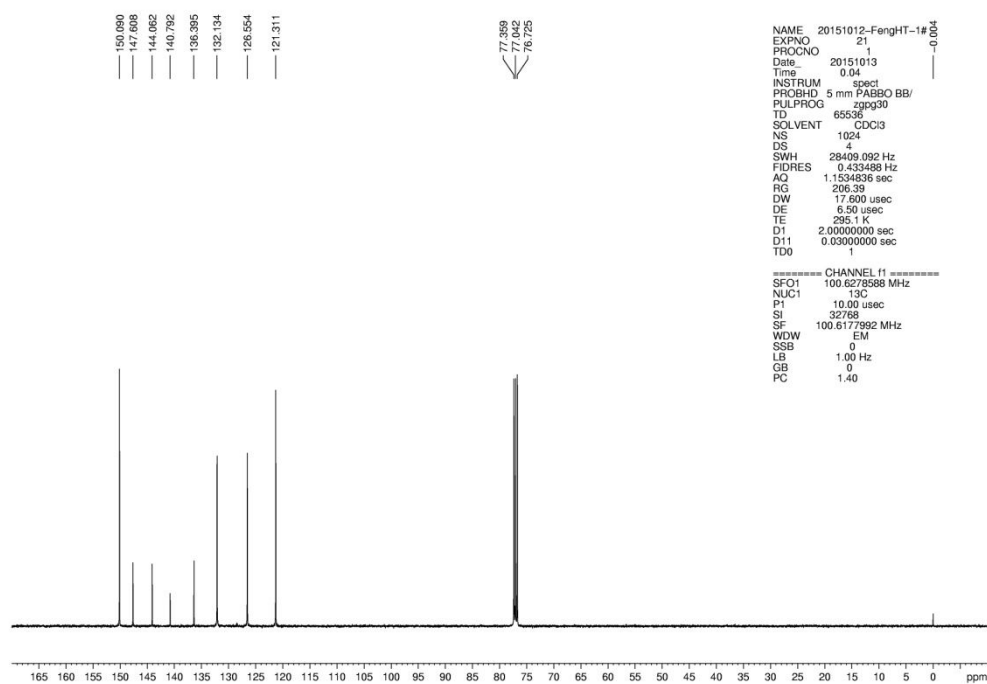

**Figure S3.**  $^1\text{H}$  NMR spectrum of compound **TPE-Py** in  $\text{CDCl}_3$ .

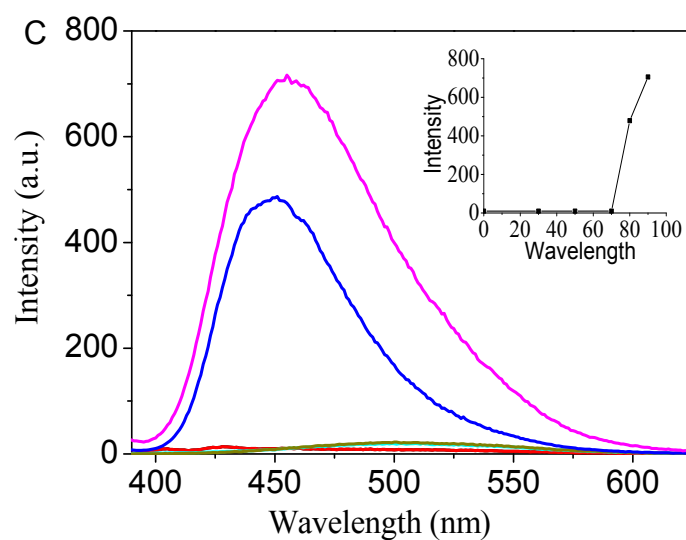

**Figure S4.** Fluorescence spectra of **TPE-Py** in THF after the addition of various amounts of water (excitation wavelength: 350 nm),  $5.0 \times 10^{-5}$  M.

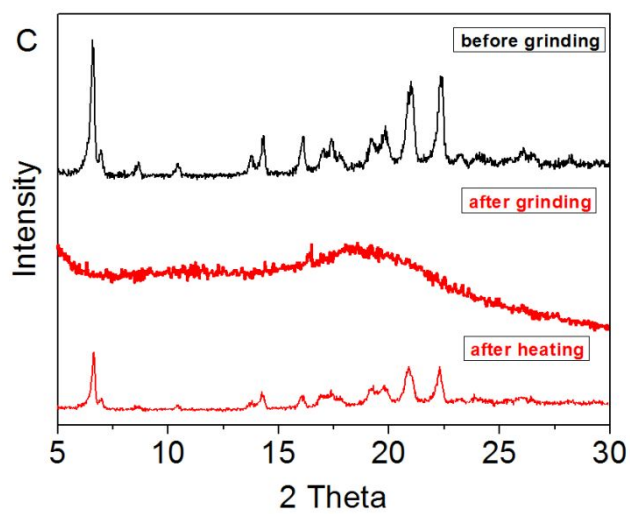

**Figure S5.** PXRD patterns of TPE-Py powders: pristine, ground and annealed sample (150 °C for 1 min).

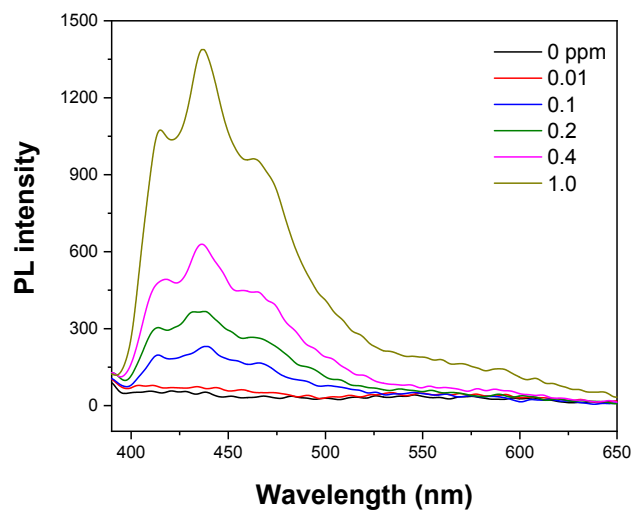

**Figure S6.** The PL emission spectrum of TPE-Py in the presence of DCP with different concentrations.



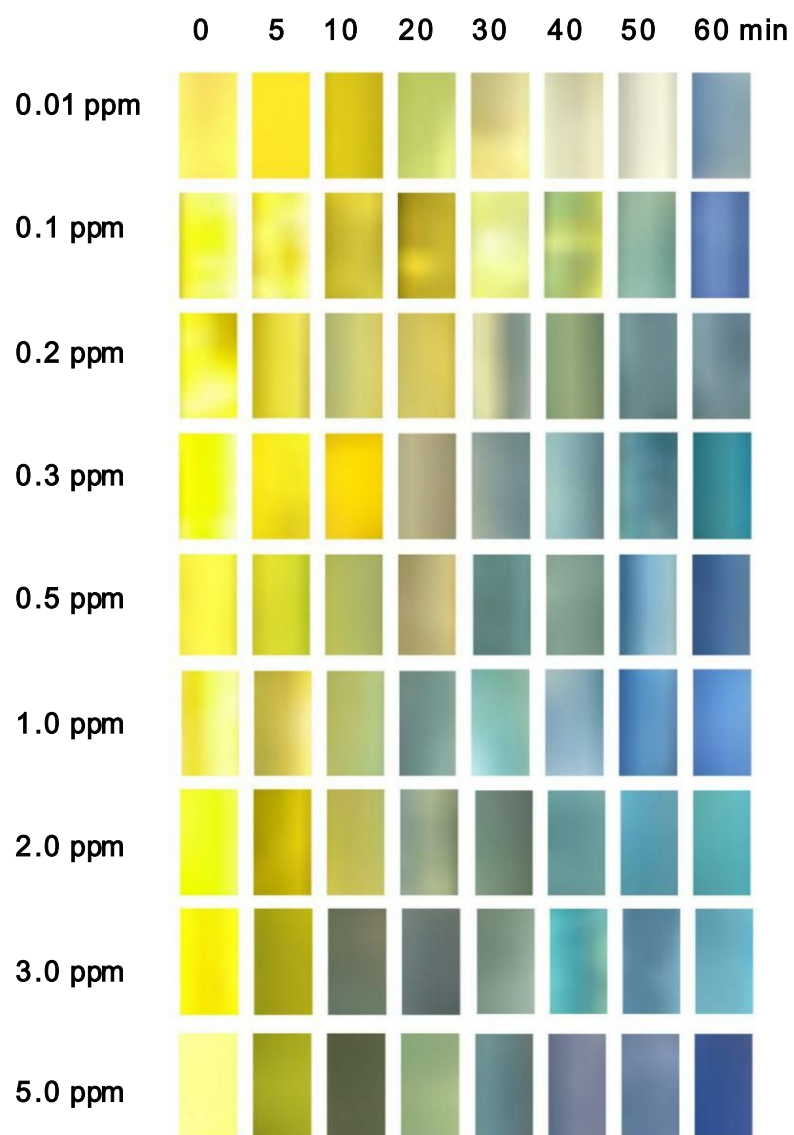

**Figure S7.** The emission of the TPE-Py coated fiber upon exposure to DCP vapor under UV lamp (the region of interest of the fiber was enlarged and rectangular shape was intercepted)

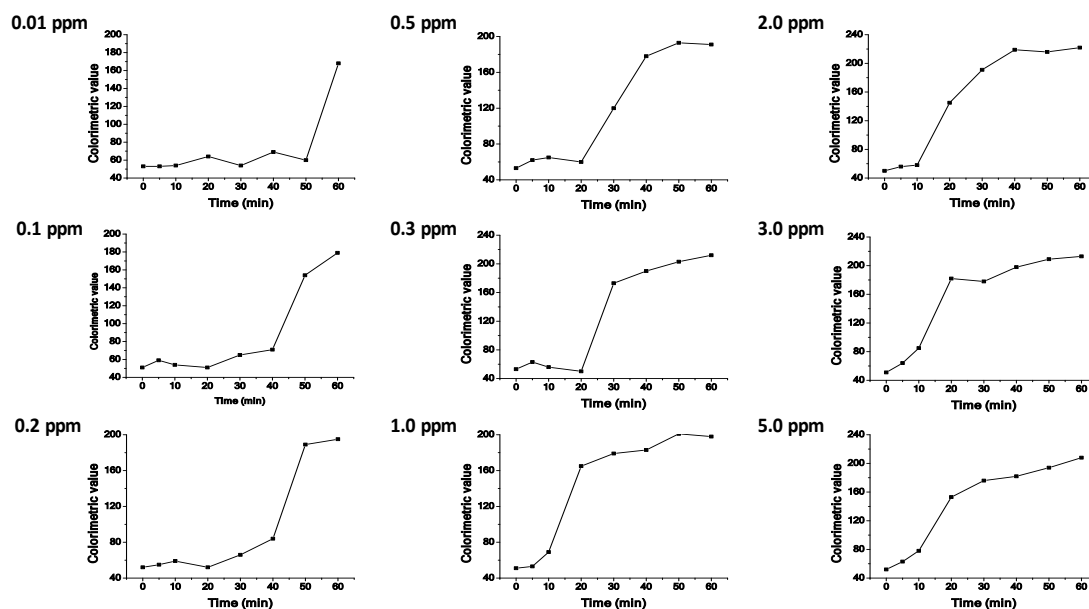

**Figure S8.** The colorimetric value of TPE-Py coated fiber upon exposure to DCP vapor at different time periods and different concentrations. (The colorimetric value was obtained by analyzing the region of interest of the fiber by Matalab code)

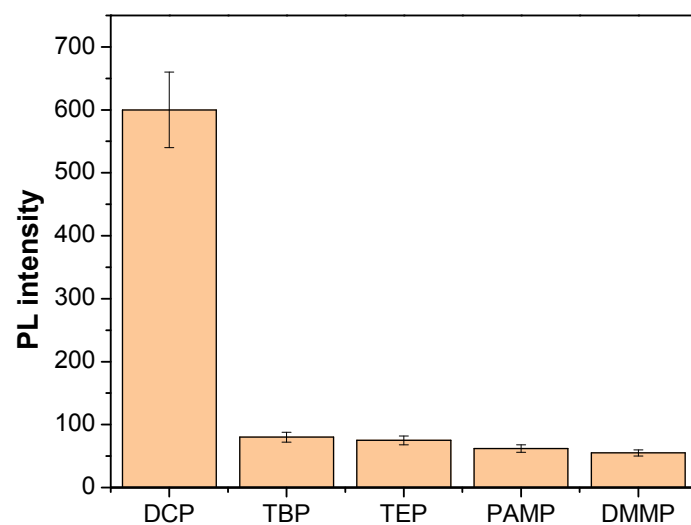

**Figure S9.** The photoluminescence intensity of TPE-Py loaded fiber upon exposure to 0.3 ppm DCP, TEP, TBP, DMMP or PAMP, respectively.

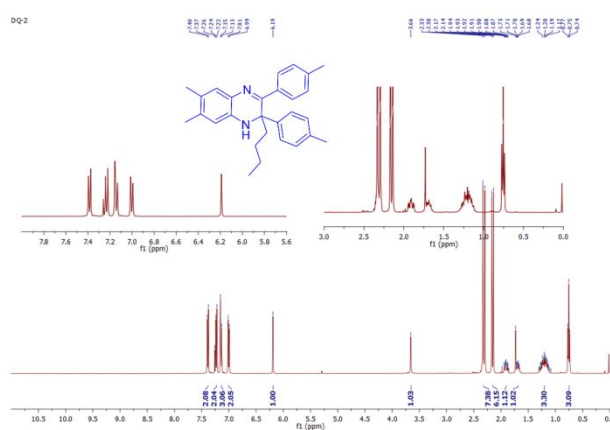

**Figure S10.**  $^1\text{H}$  NMR spectra of DQ<sub>2</sub> in  $\text{CDCl}_3$

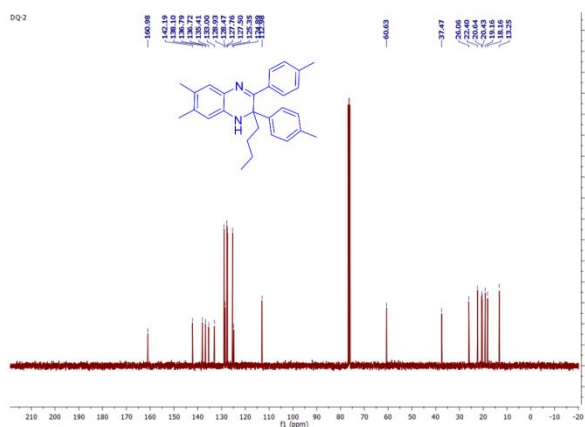

**Figure S11.**  $^{13}\text{C}$  NMR spectra of DQ<sub>2</sub> in  $\text{CDCl}_3$

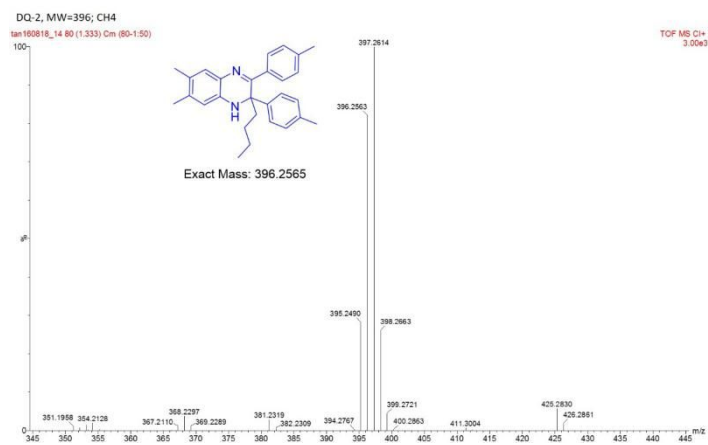

**Figure S12.** HRMS spectrum of DQ<sub>2</sub>.

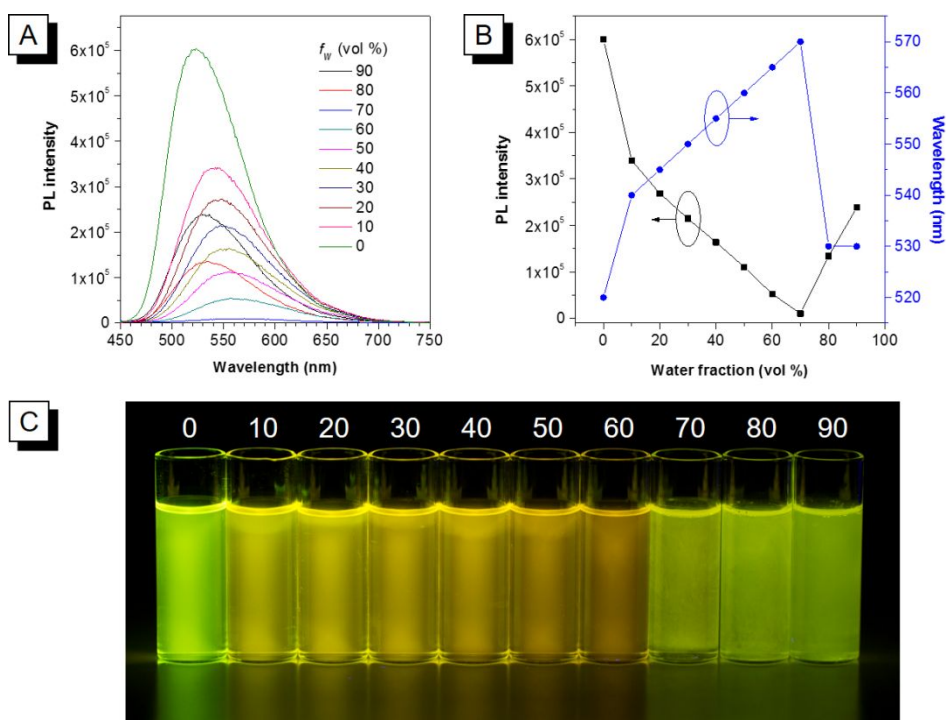

**Figure S13.** (A) PL spectra of DQ<sub>2</sub> in THF/H<sub>2</sub>O mixtures with different water fractions ( $f_w$ ). Concentration: 10  $\mu$ M;  $\lambda_{ex}$  = 400 nm. (B) Plot of PL intensity and emission maximum versus the composition of the THF/H<sub>2</sub>O mixtures of DQ<sub>2</sub>. (C) Fluorescent image of DQ<sub>2</sub> in THF/H<sub>2</sub>O mixtures with water fractions from 0 to 90% (left to right) taken under 365 nm UV irradiation.

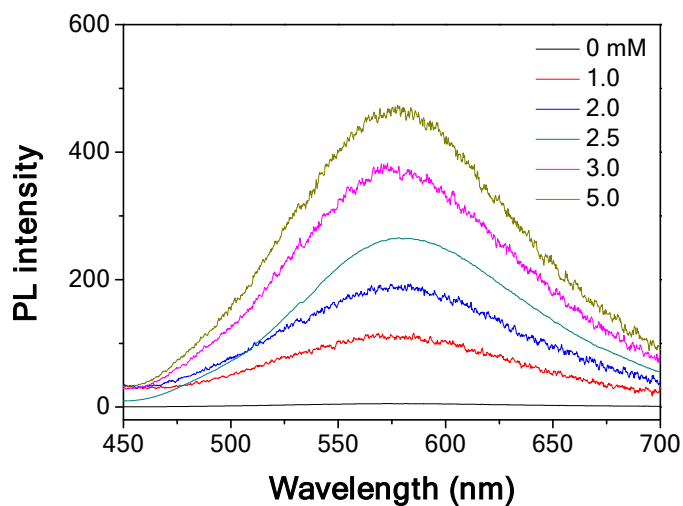

**Figure S14.** The PL emission spectrum of DQ<sub>2</sub> in the presence of amine with different concentrations.

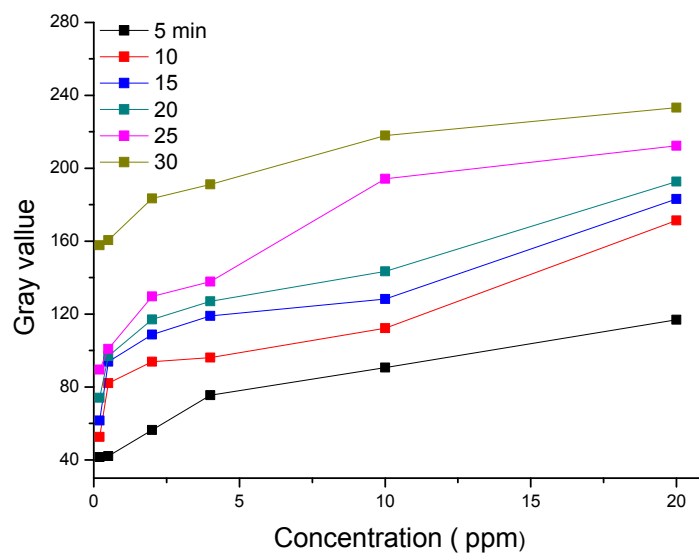

**Figure S15.** The gray value of DQ<sub>2</sub>-coated fiber upon exposure to amine vapor with different concentrations and different time. (The gray value was obtained by analyzing the region of interest

of the fiber by Matalab code)

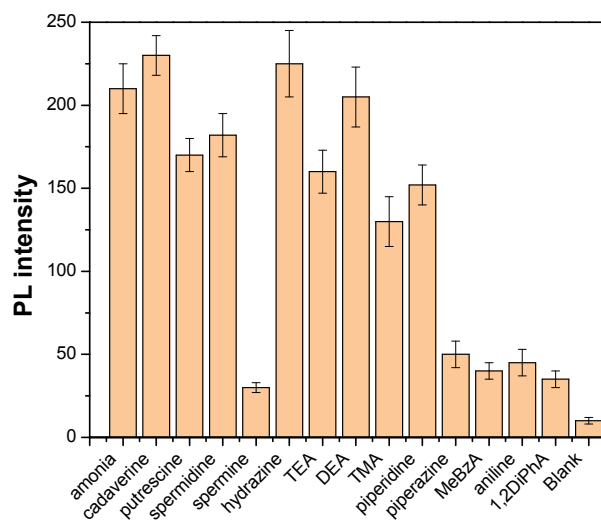

**Figure S16.** The PL turn-on response of DQ<sub>2</sub>-coated fiber in the presence of various amine solutions (0.08 M). Abbreviation: TEA=triethylamine; DEA=diethylamine; TMA=trimethylamine; MeBzA=methylbenzylamine; 1,2 DiPhA=1,2-diphenylamine.

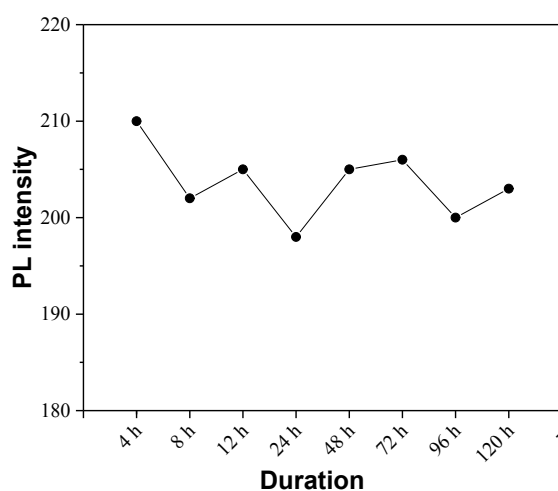

**Figure S17.** The emission of the DQ2-coated fiber in different time storage.

**Table S1.** Comparison of the LODs for detection of DCP with literatures

| Methods                                 | LODs        | References |
|-----------------------------------------|-------------|------------|
| electrochemical sensors                 | 3 ng/mL     | 37         |
| reaction based fluorescence sensor      | 10 nM       | 38         |
| nucleophilic attack fluorescence sensor | $10^{-8}$ M | 39         |
| near Infrared colorimetric              | 0.136 nM    | 40         |
| portable AIE handy pen                  | 3.4 ppb     | This work  |

**Table S2.** Comparison of the LODs for detection of amine with literatures

| Methods             | LODs                   | References |
|---------------------|------------------------|------------|
| GC-MS               | 1 pg                   | 41         |
| HPLC                | 25-50 pmol/mL          | 42         |
| electrochemical     | 0.1 (ppq) to 75000 ppm | 43         |
| colorimetric arrays | 100 ppbv               | 44         |

## MATERIALS AND METHODS

**Reagents and instruments.** 1, 2- dihydroquinoxaline (DQ<sub>2</sub>), tetraphenylethylene functionalized with pyridine rings (TPE-Py) were synthesized as reported in the literature (35, 36). Silica fiber was obtained from Rui-feng chromatography instrument Co. Ltd. Trifluoroacetic acid (95%), hydroxy-terminated polydimethylsiloxane (HTPS), amine and diethyl chlorophosphate (DCP) were purchased from Sigma-Aldrich. Methyltrimethoxysilane (MTMS) and hydrogen-containing silicone were purchased from Maclin (Shanghai, China). The concentration of amine was calculated by detector tubes purchased from Gastec, Japan.

**Description of the portable device.** The AIE handy pen consists of a coated fiber and a light source, in this case a light emitting diode (LED), to excite the luminophore on the fiber in a syringe-like holder. The arrangement of the elements is depicted in Fig. S1. There are three layers in the device. In the outer sleeve, there is a needle (1) outside for protection of the fiber. The observe window (2), power (3), and LED light (4) were also in the outer sleeve. In the middle sleeve, the metal sheet (5) can be moved to the position of A and B to make the power on or off, the buffer zone (6) was used to make the movement smoother. The needle (7) was also used to protect the fiber. The lug (8) was used to move the second sleeve. In the third sleeve, the inner chunk (9) was used to immobilize the fiber and moved by slider (10) in the district C and D to load the fiber. The spring (11) was used to help ejecting the fiber. Outside the battery there is a cover (12). The piston (13) can be moved to control the fiber at suitable position for detection and observation.

**Detection of amine/ DCP by the AIE handy pen.** First, the fiber was pushed by the plunge outside, and exposed to the vapor of the target. Then the fiber was retracted inside the needle and pulled to the position of observation window. After the UV light turned on, the emission of the fiber was obtained. The video for operation was supplied in Movie.S1. The brightness of the fluorescent images was obtained by calculating the greyscale values or colormetric values of the fiber photo by using MATLAB. The values were then used to determine the limit of detection (LOD) based on  $3s/m$ , where  $s$  is the standard deviation of the blank measurement and  $m$  is the slope of the regression line. The regression line was obtained by plotting the greyscale value or colormetric value versus the gas concentration.
